# Supplementary material for: Direct Laser Writing of Copper Micropatterns from Deep Eutectic Solvents Using Pulsed near-IR Radiation
Source: MDPI journal article supplement (doi:10.3390/nano12071127), 2022-03-29
Supplement: s1 [file s1]

# Supplementary material

## Direct Laser Writing of Copper Micropatterns from Deep Eutectic Solvents Using Pulsed near-IR Radiation

Ekaterina A. Avilova <sup>1</sup>, Evgeniia M. Khairullina <sup>2,3</sup>, Andrey Yu. Shishov <sup>2</sup>, Elizaveta A. Eltysheva <sup>1</sup>, Vladimir Mikhailovskii <sup>2</sup>, Dmitry A. Sinev <sup>1</sup> and Ilya I. Tumkin <sup>2,\*</sup>

<sup>1</sup> School of Physics and Technology, ITMO University, 197101 St. Petersburg, Russia; eaavilova@itmo.ru (E.A.A.); e.a.eltyseva@itmo.ru (E.A.E.); sinev@itmo.ru (D.A.S.)

<sup>2</sup> Institute of Chemistry, Saint Petersburg State University, 199034 St. Petersburg, Russia; e.khayrullina@spbu.ru (E.M.K.); andrey.shishov.rus@gmail.com (A.Y.S.); v.mikhailovskii@gmail.com (V.M.)

<sup>3</sup> SCAMT Laboratory, ITMO University, 197101 St Petersburg, Russia

\* Correspondence: i.i.tumkin@spbu.ru

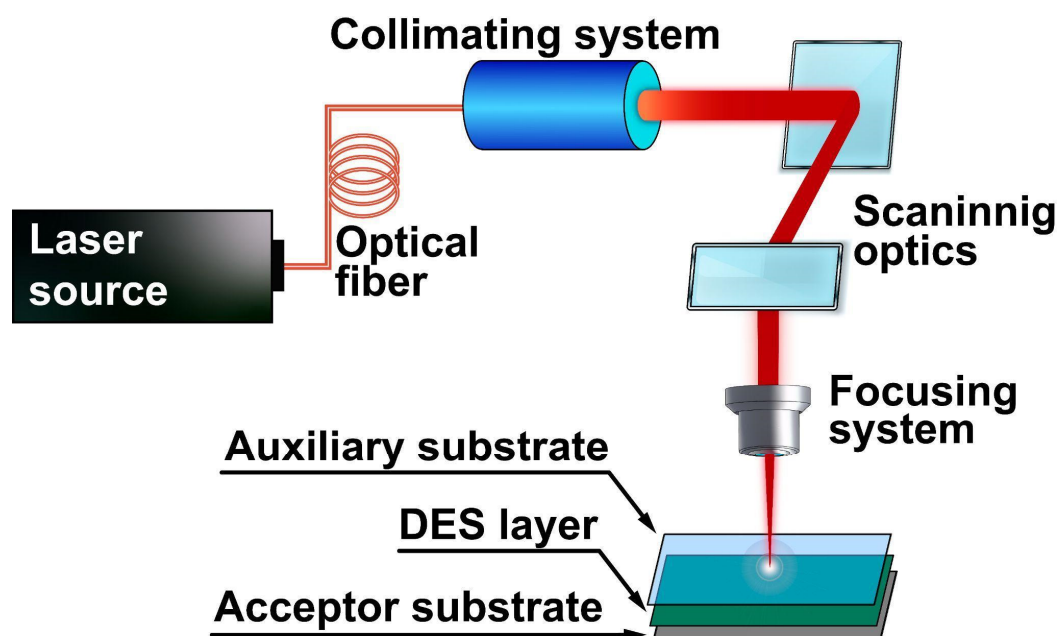

**Figure S1.** Scheme of a laser setup for laser-induced copper deposition from eutectic solvents.

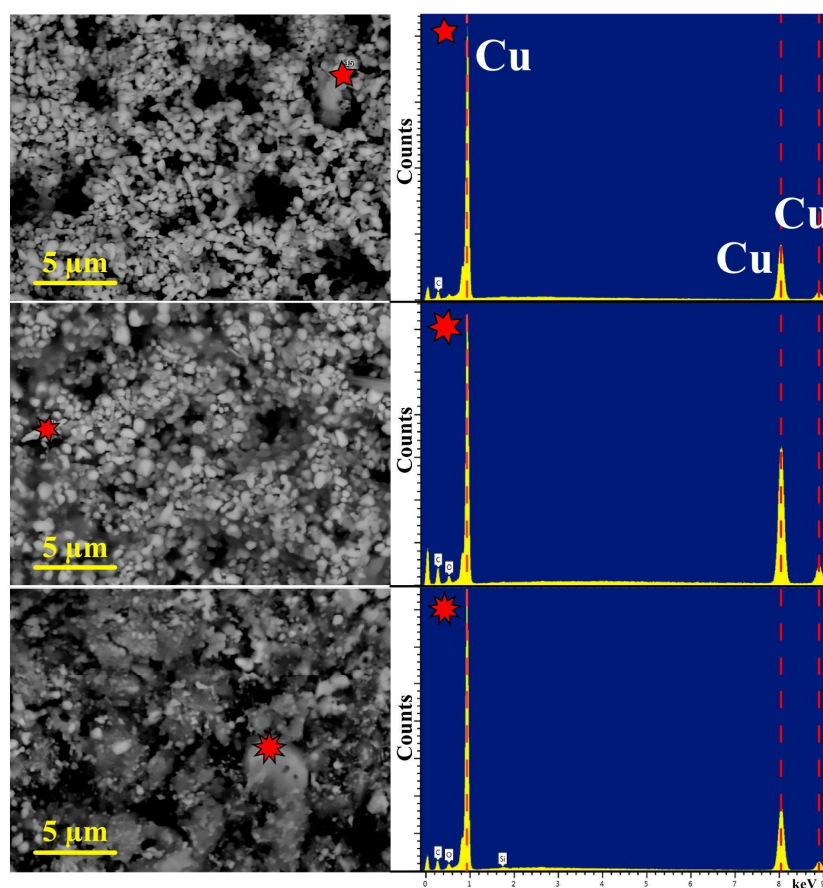

**Figure S2.** EDX spectra of copper track on laser-treated and non-cleaned substrate in three different random spot.

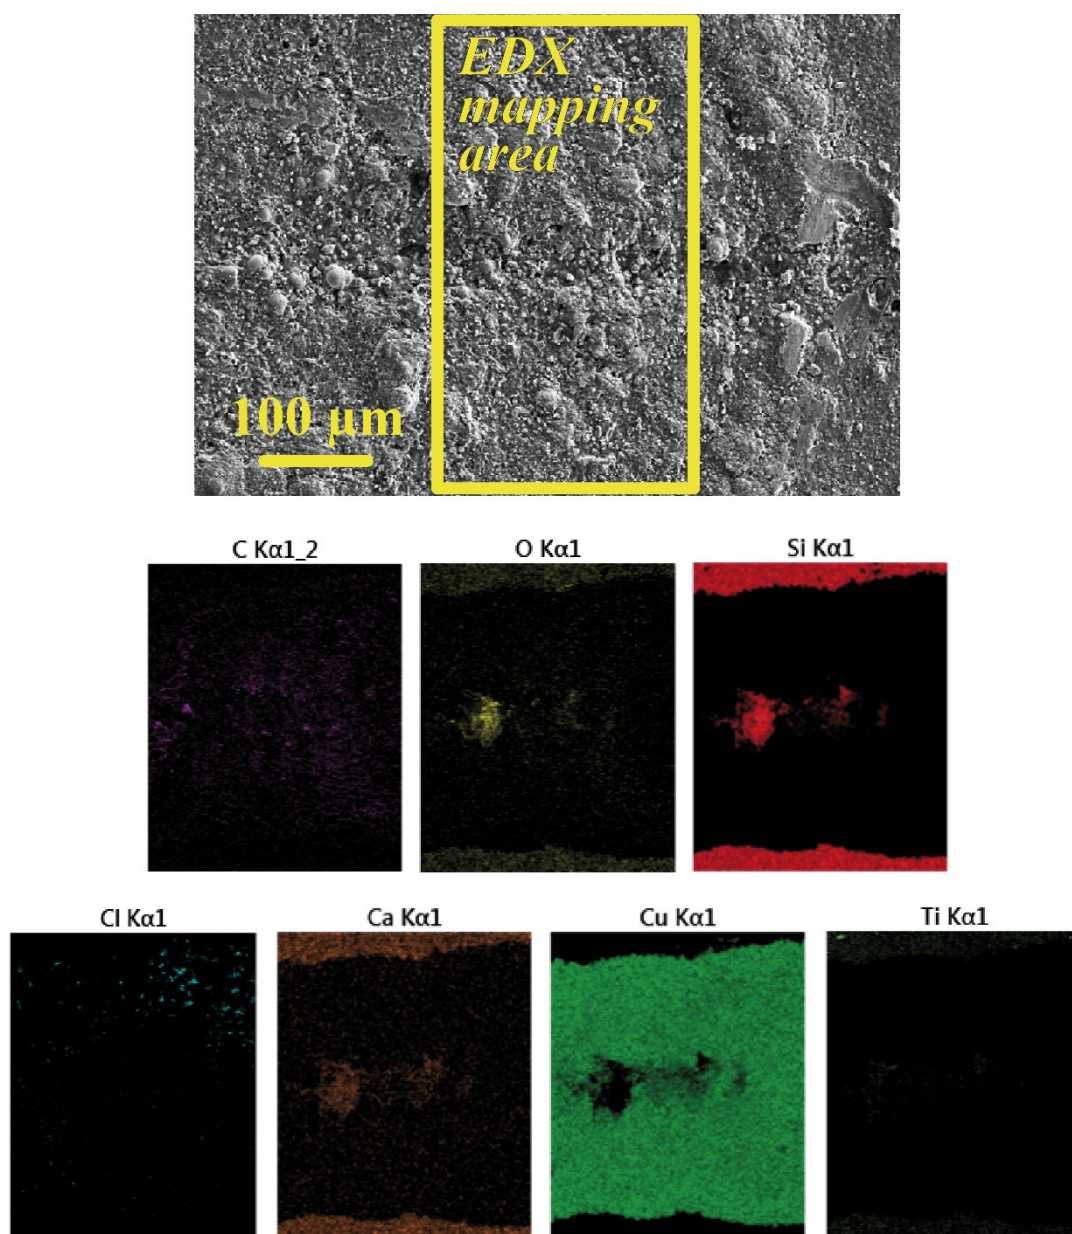

Figure S3. EDX mapping of the manufactured pattern.
